# Supplementary material for: PfMDR1: Mechanisms of Transport Modulation by Functional Polymorphisms
Source: PubMed Central journal article supplement (PMC3164660; doi:10.1371/journal.pone.0023875), 2011-09-01
Supplement: pone.0023875.s002.pdf [file pone.0023875.s002.pdf]

Supplementary figure 2

Name: Sequence                    Length: 13  
 GVILKNMNLGDDI  
 .....n.n.....  
 79

(Threshold=0.5)

| SeqName  | Position | Potential | Jury agreement | N-Glyc result |
|----------|----------|-----------|----------------|---------------|
| Sequence | 6 NMNL   | 0.5643    | (8/9)          | +             |
| Sequence | 8 NLGD   | 0.7344    | (9/9)          | ++            |

NetNGlyc 1.0: predicted N-glycosylation sites in Sequence

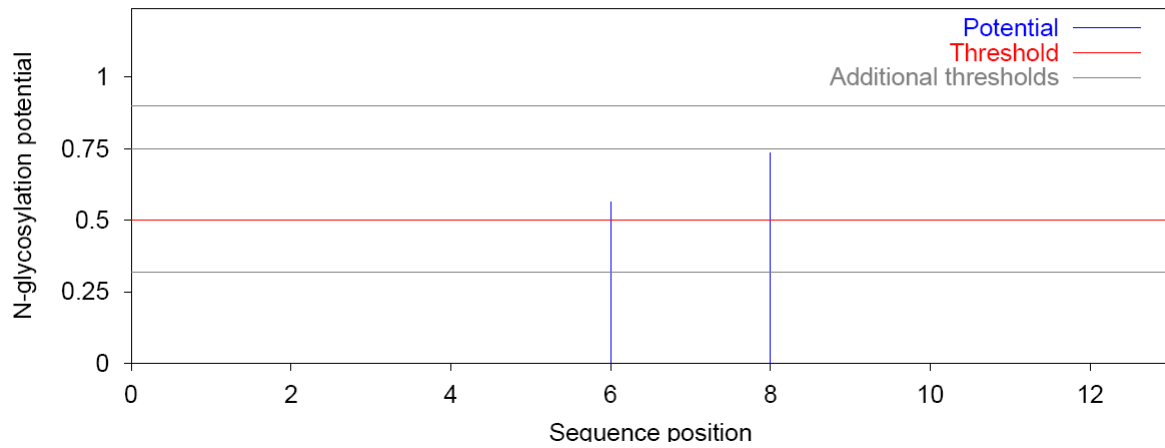

**N-glycosylation sites prediction.** External loop 1 sequence (residues 79-91) was screened for putative N-glycosylation sites. Two asparagines localize in this loop at positions 84 and 86. Predictive potential sites results from NetNglyc 1.0 software is shown.
