# Supplementary material for: PfMDR1: Mechanisms of Transport Modulation by Functional Polymorphisms
Source: PubMed Central journal article supplement (PMC3164660; doi:10.1371/journal.pone.0023875), 2011-09-01
Supplement: pone.0023875.s003.pdf [file pone.0023875.s003.pdf]

**Table S1 - PfCRT and PfMDR1 coding genotypes for clones D10<sup>SND</sup>, D10<sup>CDY</sup>, 7G8<sup>SND</sup> and 7G8<sup>CDY</sup>.**

| Clone              | PfCRT | PfMDR1 |     |      |      |      |
|--------------------|-------|--------|-----|------|------|------|
|                    | aa    | aa     |     |      |      |      |
|                    | 76    | 86     | 184 | 1034 | 1042 | 1246 |
| D10 <sup>SND</sup> | K     | N      | Y   | S    | N    | D    |
| D10 <sup>CDY</sup> | K     | N      | Y   | C    | D    | Y    |
| 7G8 <sup>SND</sup> | T     | N      | F   | S    | N    | D    |
| 7G8 <sup>CDY</sup> | T     | N      | F   | C    | D    | Y    |
